# Supplementary material for: Cold cloud microphysical process rates in a global chemistry-climate model
Source: Copernicus journal article supplement (doi:10.5194/acp-2020-365), 2020-04-27
Supplement: Supplementary file 1 [file acp-2020-365-supplement.pdf]

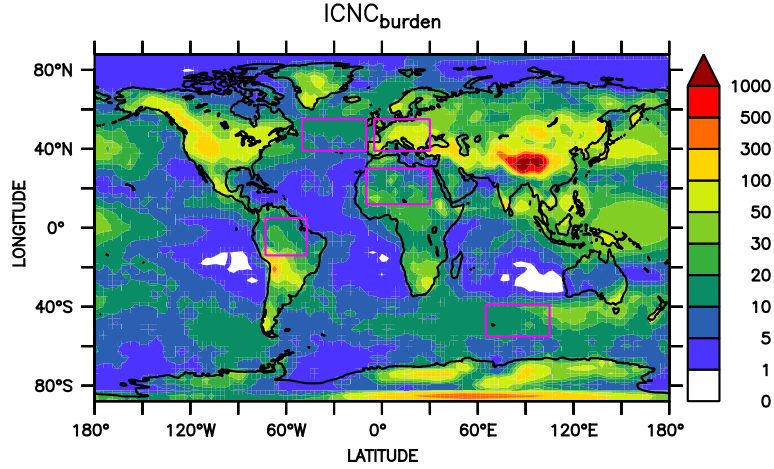

| Area    | Latitude  | Longitude  |
|---------|-----------|------------|
| SAHARA  | 12S - 30N | 10W - 30E  |
| AMAZON  | 14S - 5N  | 73W - 47W  |
| EUROPE  | 39N - 55N | 5W - 30E   |
| ATL_oce | 39N - 55N | 50W - 10W  |
| IND_oce | 55S - 39S | 65E - 105E |

**Figure S1.** Annual means of vertically integrated ICNC (in  $10^8 \text{ m}^{-2}$ ) for the simulation REF. The pink rectangles delimit the areas considered for the regional analyses in Section 4.3; the coordinates of the areas are specified in the table.

| Tendency | Mean   |        |         |        |        | Median |       |       |       |       |
|----------|--------|--------|---------|--------|--------|--------|-------|-------|-------|-------|
|          | AM     | SA     | EU      | IN     | AT     | AM     | SA    | EU    | IN    | AT    |
| DETR     | 22.90  | 17.08  | 13.65   | 9.16   | 7.33   | 0.00   | 0.00  | 0.00  | 0.00  | 0.00  |
| NCIR     | 6.22   | 2.22   | 1.96    | 2.27   | 3.11   | 0.46   | 0.24  | 0.00  | 0.00  | 0.13  |
| FREE     | 107.09 | 282.80 | 700.66  | 159.72 | 115.15 | 0.00   | 0.00  | 0.00  | 0.00  | 0.00  |
| NMIX     | 0.02   | 2.39   | 1.97    | 0.77   | 0.49   | 0.00   | 0.00  | 0.00  | 0.00  | 0.00  |
| SECP     | 0.08   | 0.07   | 0.55    | 0.60   | 0.36   | 0.00   | 0.00  | 0.00  | 0.00  | 0.00  |
| SEDI+    | 7.60   | 16.08  | 32.59   | 10.90  | 8.60   | 0.00   | 0.00  | 0.00  | 0.00  | 0.00  |
| MELT     | 0.00   | 0.00   | 0.00    | 0.00   | 0.00   | 0.00   | 0.00  | 0.00  | 0.00  | 0.00  |
| AGGR     | -32.46 | -81.99 | -187.11 | -62.18 | -48.05 | -1.23  | -0.91 | -2.30 | -1.21 | -1.05 |
| ACCR     | -16.29 | -43.98 | -99.14  | -28.87 | -24.05 | -0.25  | -0.29 | -1.80 | -0.86 | -0.46 |
| SELF     | -0.17  | -0.44  | -1.08   | -0.30  | -0.22  | 0.00   | 0.00  | 0.00  | 0.00  | 0.00  |
| SEDI-    | -16.61 | -30.03 | -61.47  | -21.06 | -15.20 | -1.41  | -0.90 | -0.27 | -0.23 | -0.27 |

**Table S1.** Statistics computed from the 5-hourly ICNC tendencies, output of the simulations REF: means and medians of ICs (in  $\text{m}^{-3} \text{ s}^{-1}$ ) are computed over the regions Amazon (AM), Sahara (SA), Europe (EU), Indian Ocean (IN), and Atlantic Ocean (AT) in grid-box volumes where  $\text{ICNC} > 1 \text{ L}^{-1}$ . (Note that SEDI+ and SEDI- take into account only positive and negative values, respectively.)

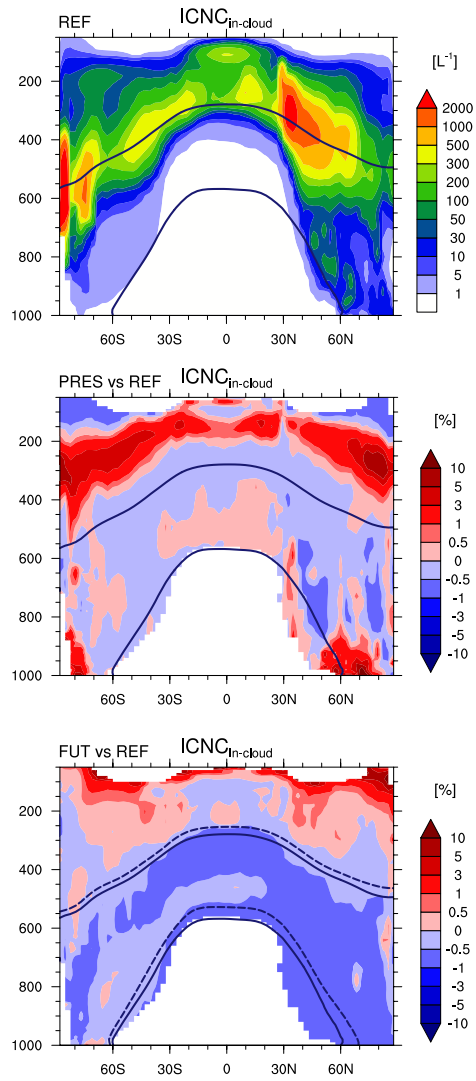

**Figure S2.** Annual zonal means of (grid-averaged) ICNC for the simulation REF and the relative percentage changes of PRES and FUT with respect to REF, computed where the ICNC in REF is  $> 1L^{-1}$ . The isotherms at  $0^{\circ}C$  and  $-35^{\circ}C$  are annual means in REF (solid lines) and in FUT (dashed lines).

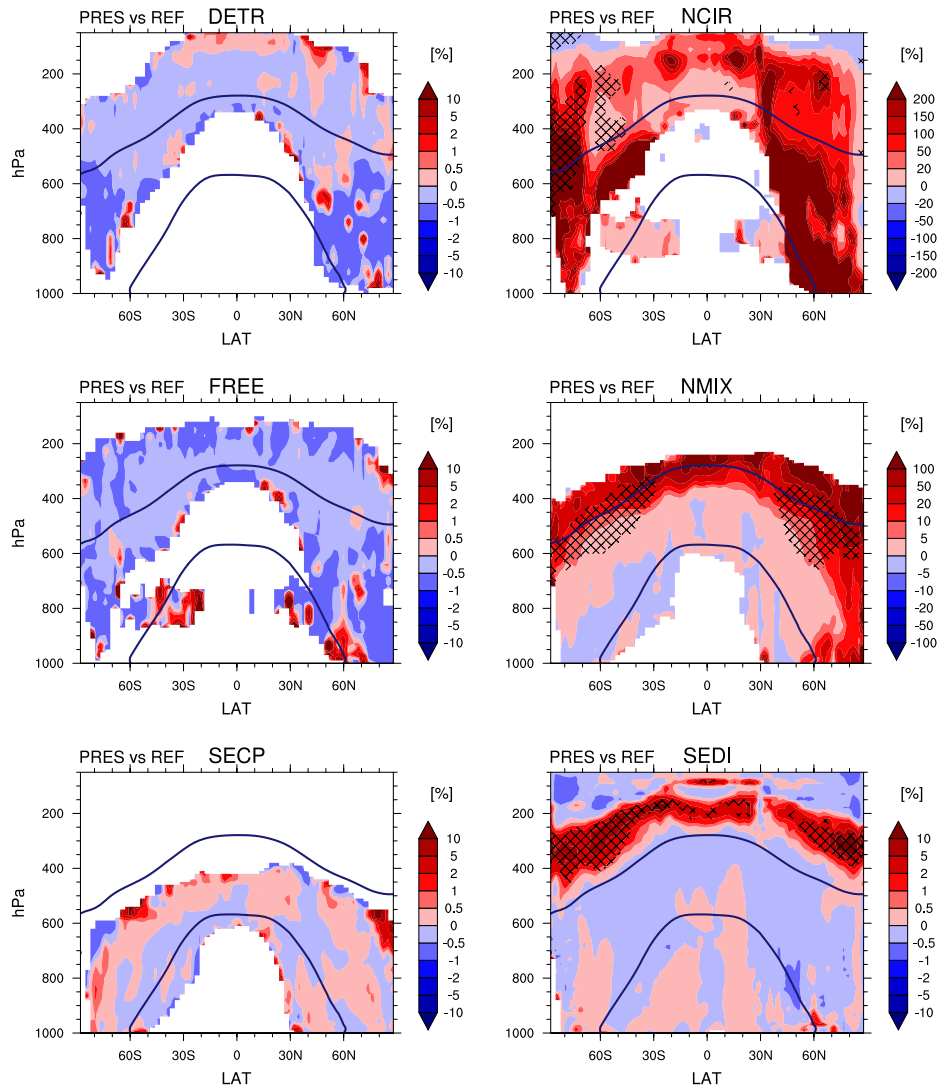

**Figure S3.** Relative percentage changes of the tendencies associated to the IC sources in cold clouds in PRES with respect to REF, computed where the tendencies in REF are  $> 10^{-5} \text{m}^{-3} \text{s}^{-1}$ . The hatched pattern indicates areas with a significance level of 70%. The isotherms (solid lines) at  $0^{\circ}\text{C}$  and  $-35^{\circ}\text{C}$  are annual means in REF. (Note that SEDI here takes into account only positive values.)

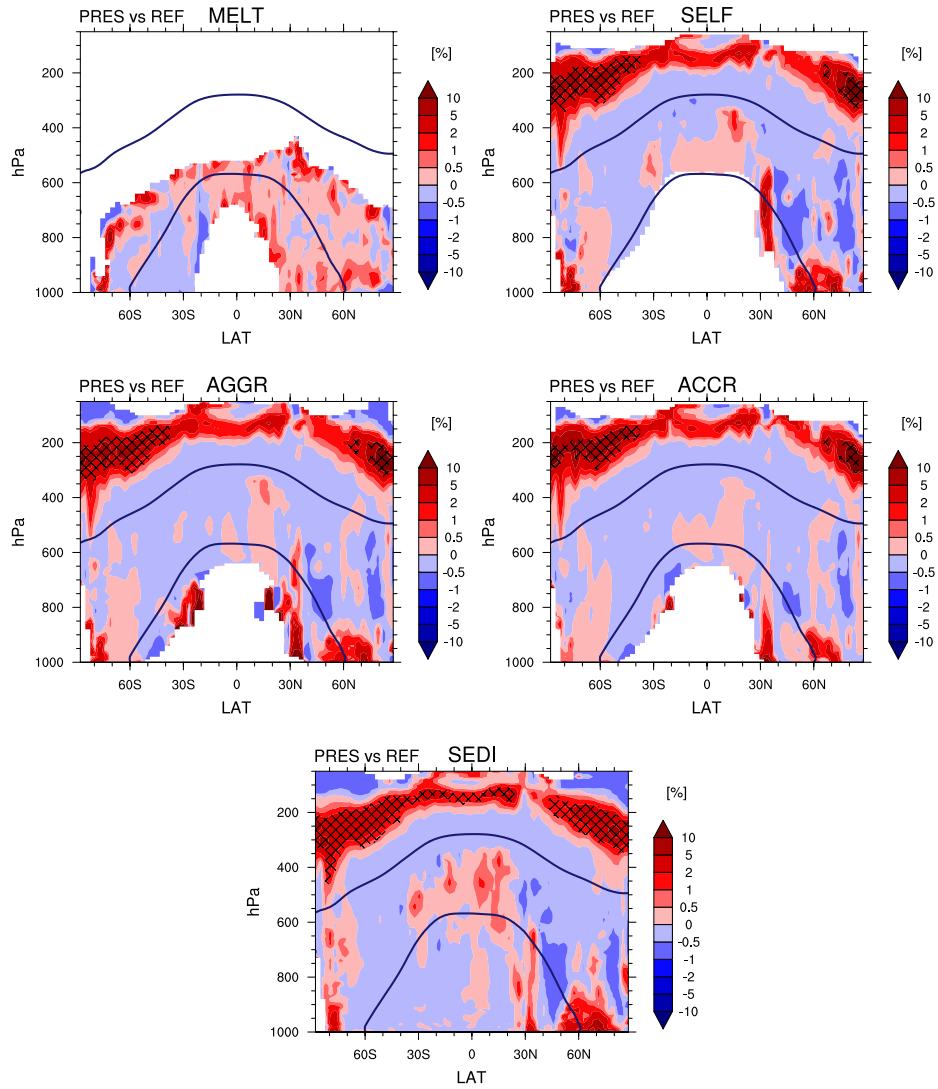

**Figure S4.** Relative percentage changes of the tendencies associated to the IC sinks in cold clouds in PRES with respect to REF, computed where the tendencies in REF are  $> 10^{-5} \text{m}^{-3} \text{s}^{-1}$ . The hatched pattern indicates areas with a significance level of 70%. The isotherms (solid line) at  $0^{\circ}\text{C}$  and  $-35^{\circ}\text{C}$  are annual means in REF. (Note that SEDI here takes into account only negative values.)

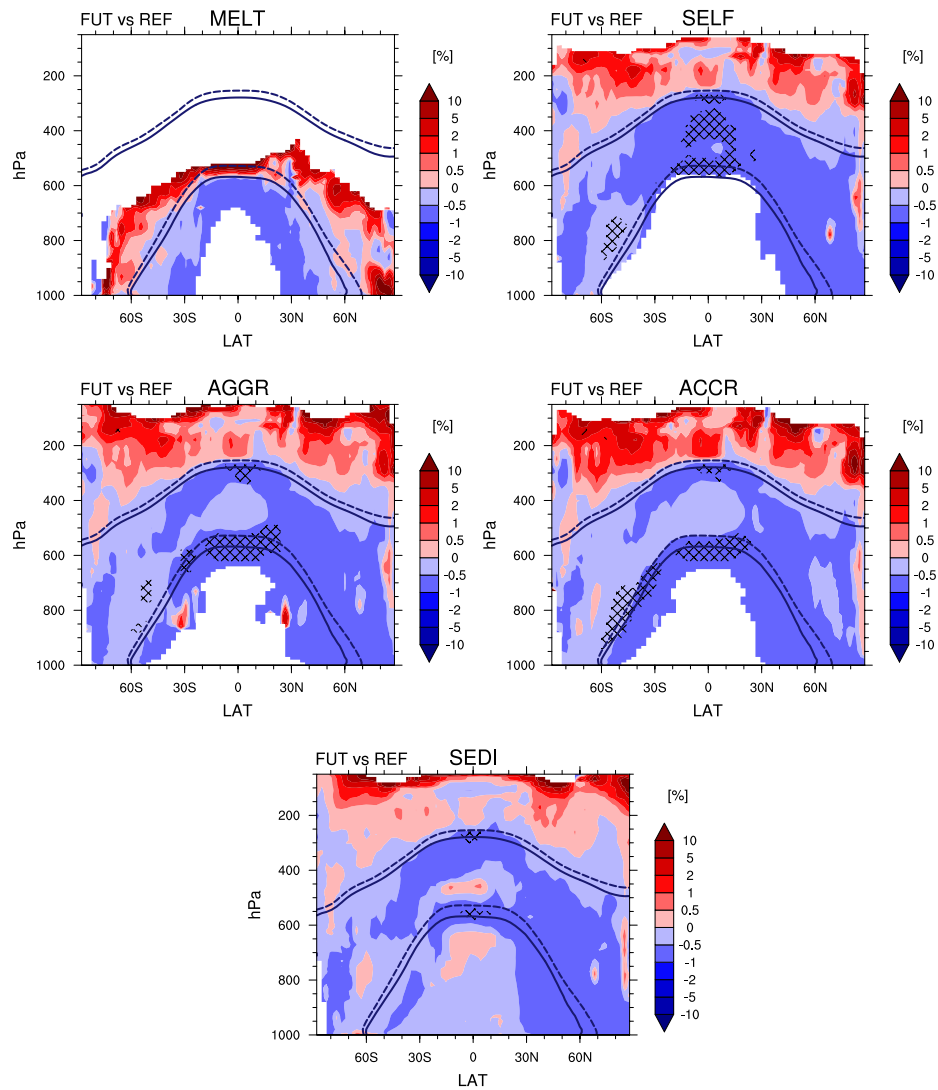

**Figure S5.** Relative percentage changes of the tendencies associated to the IC sinks in cold clouds in FUT with respect to REF, computed where the tendencies in REF are  $> 10^{-5} \text{m}^{-3} \text{s}^{-1}$ . The hatched pattern indicates areas with a significance level of 70%. The isotherms at  $0^{\circ}\text{C}$  and  $-35^{\circ}\text{C}$  are annual means in REF (solid lines) and in FUT (dashed lines). (Note that SEDI here takes into account only negative values.)
